# Supplementary material
Source: publisher site journal article supplement (https://www.dovepress.com/article/499734)
Supplement: Supplementary file 1 [file 499734-Appendix-1.docx]

Interviewer Reminders

- Greet the participant and thank them for coming to the meeting.
- Obtain informed consent, including consent to be recorded.
- Ensure the audio recorder is functioning.
- Keep detailed interview notes.
- Note date, time, and participant ID# _________________

Interview Script: Researcher/Research Assistant

Introduction: Hello, my name is ______________, and I am here to complete a follow-up interview based on your responses in the first phase of Dr. Smith’s heart study. Thank you for agreeing to participate.

The purpose of the heart study UPSTREAM CVD is to better understand heart disease risk factors and how to prevent them in young African American people ages 18-25. The purpose of this phase of the study is to better understand your perceptions of your risk of developing heart disease and potential strategies to help eliminate your heart disease risk. There are no right or wrong answers, and any experiences or opinions you’d like to share are welcome.

Did you have a chance to read the consent form sent to you by email? (If no, provide a few minutes for them to read it). We will not share identifying information about you. We are only capturing your opinions.

- Would you please give verbal consent to your participation? (ask participant to state response).
- Also, we are recording the interview so we can go back and capture your thoughts. Is that alright with you? (ask to state response).
- Do you have any further questions about this study?
- Tell me what you think about heart disease?
- Please tell me about events in your life that may influence your knowledge and attitude.
- Based on your responses to the survey, the measurements taken by the study nurse, and your lab work results, you perceived your heart disease risk to ____________ (low, high, or moderate), but (or and if equal) you have a _____________ heart health score. This means you thought you had a ________ risk of developing heart disease but (or and if equal) have a ___________ risk of developing heart disease.
- Tell me what you think of that?

Post Interview Reminders

- Record reflections in field notes.
- Download zoom recording from the cloud – naming convention: Participant ID, initials in a passworded folder.
